# Supplementary material for: Airborne observations of upper troposphere and lower stratosphere composition change in active convection producing above-anvil cirrus plumes
Source: Copernicus journal article supplement (doi:10.5194/acp-24-7591-2024), 2024-07-04
Supplement: Supplementary file 1 [file acp-24-7591-2024-supplement.zip]

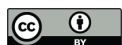

*Supplement of*

## **Airborne observations of upper troposphere and lower stratosphere composition change in active convection producing above-anvil cirrus plumes**

**Andrea E. Gordon et al.**

*Correspondence to:* Andrea E. Gordon (agordon@ou.edu)

- [acp-24-7591-2024-supplement-title-page.pdf](#)
- [satellite\\_flighttrack\\_20220531.mov](#)

The copyright of individual parts of the supplement might differ from the article licence.
